# Supplementary material for: Association between Different Types of Plant-Based Diets and Risk of Dyslipidemia: A Prospective Cohort Study
Source: PubMed Central journal article supplement (PMC7828805; doi:10.3390/nu13010220), 2021-01-14
Supplement: nutrients-13-00220-s001.pdf [file nutrients-13-00220-s001.pdf]

## Supplemental information

**Table S1.** Nutritional characteristics of diet according to quintiles of plant-based diet indices among Korean adults.

|                                         | Quintile 1 | Quintile 2 | Quintile 3 | Quintile 4  | Quintile 5  | P-value |
|-----------------------------------------|------------|------------|------------|-------------|-------------|---------|
| <b>Overall plant-based diet index</b>   |            |            |            |             |             |         |
| Total energy intake, kcal/day           | 2045±696   | 1955± 636  | 1907± 597  | 1912±588    | 1846±589    | <0.0001 |
| Carbohydrate, % of energy               | 69.3 (7.9) | 71.0 (7.6) | 72.6 (6.9) | 72.7 (6.5)  | 74.5 (5.9)  | <0.0001 |
| Protein, % of energy                    | 14.0 (2.4) | 13.8 (2.5) | 13.4 (2.3) | 13.5 (2.3)  | 13.1 (2.0)  | <0.0001 |
| Fat, % of energy                        | 16.7 (5.8) | 15.2 (5.6) | 14.0 (5.1) | 13.9 (4.8)  | 12.4 (4.3)  | <0.0001 |
| Calcium, mg/1000 kcal                   | 239.9±99.2 | 240.6±97.3 | 237.8±95.8 | 251.9±101.0 | 248.6±95.1  | 0.0078  |
| Phosphorus, mg/1000 kcal                | 519.6±87.2 | 520.5±91.4 | 518.8±89.0 | 531.9±92.3  | 530.0±84.3  | 0.0017  |
| Iron, mg/1000 kcal                      | 5.1±1.4    | 5.4±1.4    | 5.5±1.4    | 5.8±1.4     | 6.0±1.5     | <0.0001 |
| Potassium, mg/1000 kcal                 | 1154±332   | 1251±357   | 1282±349   | 1377±363    | 1457±367    | <0.0001 |
| Niacin, mg/1000 kcal                    | 7.9±1.7    | 7.9±1.7    | 7.8±1.5    | 8.0±1.5     | 8.1±1.5     | 0.0029  |
| Vitamin C, mg/1000 kcal                 | 52.8±34.3  | 62.3±35.9  | 63.6±34.5  | 72.0±36.7   | 78.0±38.1   | <0.0001 |
| Zinc, mg/1000 kcal                      | 4.6±1.2    | 4.5±1.3    | 4.4±1.1    | 4.4±1.1     | 4.3±1.0     | <0.0001 |
| Vitamin B-6, mg/1000 kcal               | 0.9±0.2    | 0.9±0.2    | 0.9±0.2    | 1.0±0.2     | 1.0±0.2     | <0.0001 |
| Folate, µg /1000 kcal                   | 106.5±36.4 | 120.3±43.3 | 124.7±40.2 | 136.1±43.9  | 146.9±48.6  | <0.0001 |
| Beta-carotene, µg/1000 kcal             | 1113±764   | 1284±883   | 1354±950   | 1481±945    | 1653±1122   | <0.0001 |
| Fiber, g/1000 kcal                      | 2.9±1.0    | 3.4±1.1    | 3.6±1.1    | 4.0±1.2     | 4.4±1.3     | <0.0001 |
| Vitamin E, mg/1000 kcal                 | 4.4±1.5    | 4.6±1.5    | 4.6±1.4    | 4.8±1.4     | 5.0±1.5     | <0.0001 |
| Cholesterol, mg/1000 kcal               | 107.9±54.9 | 94.6±54.0  | 83.9±51.9  | 78.9±47.5   | 63.8±42.2   | <0.0001 |
| <b>Healthful plant-based diet index</b> |            |            |            |             |             |         |
| Total energy intake, kcal/day           | 1929±607   | 2007± 647  | 1952±630   | 1888±609    | 1894±629    | <0.0001 |
| Carbohydrate, % of energy               | 69.0 (6.9) | 70.7 (7.2) | 72.3 (7.2) | 73.3 (6.8)  | 74.7 (6.7)  | <0.0001 |
| Protein, % of energy                    | 14.0 (2.3) | 13.8 (2.5) | 13.5 (2.4) | 13.4 (2.2)  | 13.2 (2.2)  | <0.0001 |
| Fat, % of energy                        | 16.9 (5.1) | 15.5 (5.2) | 14.3 (5.2) | 13.4 (5.0)  | 12.2 (4.9)  | <0.0001 |
| Calcium, mg/1000 kcal                   | 256.2±91.7 | 251.4±94.8 | 241.5±95.3 | 237.6±102.3 | 229.8±101.6 | <0.0001 |
| Phosphorus, mg/1000 kcal                | 522.3±82.9 | 523.3±89.8 | 519.0±88.8 | 522.9±92.1  | 530.9±90.7  | 0.0822  |
| Iron, mg/1000 kcal                      | 5.3±1.3    | 5.5±1.4    | 5.5±1.5    | 5.6±1.5     | 5.9±1.5     | <0.0001 |
| Potassium, mg/1000 kcal                 | 1264±319   | 1308±362   | 1293±361   | 1294±377    | 1339±409    | 0.0006  |
| Niacin, mg/1000 kcal                    | 8.2±1.6    | 8.1±1.7    | 7.9±1.5    | 7.8±1.5     | 7.7±1.6     | <0.0001 |
| Vitamin C, mg/1000 kcal                 | 57.3±26.3  | 65.4±33.9  | 67.2±39.4  | 66.7±38.5   | 70.4±42.7   | <0.0001 |
| Zinc, mg/1000 kcal                      | 4.6±1.3    | 4.5±1.3    | 4.4±1.3    | 4.4±0.9     | 4.3±0.9     | 0.0003  |

|                                           |            |            |            |            |            |         |
|-------------------------------------------|------------|------------|------------|------------|------------|---------|
| Vitamin B-6, mg/1000 kcal                 | 0.9±0.2    | 0.9±0.2    | 0.9±0.2    | 0.9±0.2    | 0.9±0.2    | 0.2222  |
| Folate, µg /1000 kcal                     | 120.4±41.1 | 126.0±42.7 | 124.6±42.3 | 127.4±46.5 | 133.1±48.5 | <0.0001 |
| Beta-carotene, µg/1000 kcal               | 1358±847   | 1430±923   | 1378±963   | 1355±976   | 1325±1046  | 0.1799  |
| Fiber, g/1000 kcal                        | 3.2±1.0    | 3.5±1.1    | 3.6±1.2    | 3.8±1.2    | 4.1±1.3    | <0.0001 |
| Vitamin E, mg/1000 kcal                   | 4.8±1.3    | 4.8±1.5    | 4.7±1.5    | 4.5±1.4    | 4.6±1.6    | <0.0001 |
| Cholesterol, mg/1000 kcal                 | 108.1±49.3 | 96.0±53.6  | 85.2±52.5  | 78.5±49.1  | 63.3±47.0  | <0.0001 |
| <b>Unhealthful plant-based diet index</b> |            |            |            |            |            |         |
| Total energy intake, kcal/day             | 2075±583   | 2054± 633  | 1931±648   | 1875±626   | 1707±557   | <0.0001 |
| Carbohydrate, % of energy                 | 67.4 (6.4) | 69.5 (6.3) | 71.4 (6.7) | 74.3 (6.0) | 78.1 (5.9) | <0.0001 |
| Protein, % of energy                      | 15.2 (2.1) | 14.4 (2.0) | 13.8 (2.1) | 12.7 (1.8) | 11.5 (1.7) | <0.0001 |
| Fat, % of energy                          | 17.5 (4.8) | 16.1 (4.8) | 14.9 (5.1) | 12.9 (4.6) | 10.4 (4.6) | <0.0001 |
| Calcium, mg/1000 kcal                     | 299.4±98.0 | 266.5±89.7 | 247.4±91.5 | 214.7±87.7 | 181.5±77.1 | <0.0001 |
| Phosphorus, mg/1000 kcal                  | 590.2±81.3 | 553.5±73.3 | 530.6±79.0 | 489.7±70.9 | 445.2±65.9 | <0.0001 |
| Iron, mg/1000 kcal                        | 6.5±1.3    | 5.9±1.3    | 5.7±1.4    | 5.1±1.2    | 4.4±1.2    | <0.0001 |
| Potassium, mg/1000 kcal                   | 1488±347   | 1369± 326  | 1326±358   | 1201±335   | 1087±345   | <0.0001 |
| Niacin, mg/1000 kcal                      | 9.0±1.5    | 8.4±1.5    | 8.1±1.5    | 7.5±1.3    | 6.8±1.3    | <0.0001 |
| Vitamin C, mg/1000 kcal                   | 75.6±39.9  | 68.0±37.4  | 65.7±35.9  | 60.7±33.4  | 55.7±34.1  | <0.0001 |
| Zinc, mg/1000 kcal                        | 4.9±1.3    | 4.6±0.9    | 4.5±1.3    | 4.2±1.1    | 3.9±0.7    | <0.0001 |
| Vitamin B-6, mg/1000 kcal                 | 1.0±0.2    | 1.0±0.2    | 0.9±0.2    | 0.9±0.2    | 0.8±0.2    | <0.0001 |
| Folate, µg /1000 kcal                     | 141.6±41.9 | 131.9±41.1 | 130.5±47.5 | 117.5±42.0 | 107.7±41.8 | <0.0001 |
| Beta-carotene, µg/1000 kcal               | 1574±1060  | 1445±936   | 1404±941   | 1239±874   | 1163±887   | <0.0001 |
| Fiber, g/1000 kcal                        | 3.9±1.1    | 3.7±1.2    | 3.7±1.3    | 3.5±1.2    | 3.4±1.2    | <0.0001 |
| Vitamin E, mg/1000 kcal                   | 5.5±1.4    | 5.1±1.4    | 4.7±1.3    | 4.2±1.2    | 3.8±1.4    | <0.0001 |
| Cholesterol, mg/1000 kcal                 | 119.5±50.5 | 101.4±48.5 | 89.8±51.5  | 68.5±40.6  | 47.4±39.2  | <0.0001 |
